# Supplementary material for: Afghanistan's Ethnic Groups Share a Y-Chromosomal Heritage Structured by Historical Events
Source: PLoS One. 2012 Mar 28;7(3):e34288. doi: 10.1371/journal.pone.0034288 (PMC3314501; doi:10.1371/journal.pone.0034288)
Supplement: Table S3 — Populations selected for this study. (XLS) [file pone.0034288.s004.xls]

## Sheet: Sheet1
Table S3: Populations selected for this study
					Applied Tests
Geographic Region		Population/Location	N	Reference	PCA	AMOVA	Barrier	MDS	Network	BATWING
Central Asia
	Afghanistan	Pashtun	49	This study	X	X	X	X	X	X
		Tajik	56	This study	X	X	X	X	X	X
		Hazara	60	This study	X	X	X	X	X	X
		Uzbek	17	This study	X	X	X	X	X	X
		Baluch	13	This study					X
		Norestani	5	This study					X
		Arab	3	This study
		Turkmen	1	This study
	Pakistan	Pashtun	21	Sengupta et al., 2006	X
		Hazara	25	Sengupta et al., 2006	X
		Baluch	25	Sengupta et al., 2006	X
		Burusho	20	Sengupta et al., 2006	X
		Brahui	25	Sengupta et al., 2006	X
		Kalash	20	Sengupta et al., 2006	X
		Makrani	20	Sengupta et al., 2006	X
		Sindhi	21	Sengupta et al., 2006	X
South Asia
	India	Central	71	Sengupta et al., 2006	X
		East	128	Sengupta et al., 2006	X
		North	259	Sengupta et al., 2006; Yadav et al., 2011	X		X	X		X
		Northeast	87	Sengupta et al., 2006	X
		South	456	Sengupta et al., 2006; Balamurugan et al., 2010	X		X	X		X
		West	157	Sengupta et al., 2006; Thangaraj et al., 2010	X		X	X		X
East Asia
	China	Buyi	35	Xue et al., 2006	X
		Daur	39	Xue et al., 2006	X
		Ewenki	26	Xue et al., 2006	X
		Han	166	Xue et al., 2006	X
		Hani	34	Xue et al., 2006	X
		Hezhe	45	Xue et al., 2006	X
		Hui	35	Xue et al., 2006	X
		Korean	25	Xue et al., 2006	X
		Li	34	Xue et al., 2006	X
		Manchu	35	Xue et al., 2006	X
		Mongolian	45	Xue et al., 2006	X
		Oroqen	31	Xue et al., 2006	X
		Qiang	33	Xue et al., 2006	X
		She	34	Xue et al., 2006	X
		Tibetans	35	Xue et al., 2006	X
		Uygur	70	Xue et al., 2006	X
		Xibe	41	Xue et al., 2006	X
		Yao	70	Xue et al., 2006	X
	Japan	Japanese	70	Xue et al., 2006; Sengupta et al., 2006	X
	Mongolia	Mongolian	65	Xue et al., 2006	X
	Korea	Korean	43	Xue et al., 2006	X
	Russia	Siberia	18	Sengupta et al., 2006	X
Caucasus
	Dagestan	Avars	115	Balanovsky et al., 2011	X	X	X	X	X	X
		Darginian	101	Balanovsky et al., 2011	X	X	X	X	X
		Kaitag	33	Balanovsky et al., 2011	X				X
		Kubachi	65	Balanovsky et al., 2011	X				X
		Lezgi	81	Balanovsky et al., 2011	X	X	X	X	X	X
	Abkhazia	Abkhazian	58	Balanovsky et al., 2011	X	X	X	X	X
	Adygea	Shapsug	100	Balanovsky et al., 2011	X				X
	Chechnya, Ingushetia	Chechen	330	Balanovsky et al., 2011	X	X	X	X	X
	Ingushetia	Ingush	143	Balanovsky et al., 2011	X				X
	Karachay-Cherkessia	Circassian	142	Balanovsky et al., 2011	X	X	X	X	X	X
	North Ossetia	Ossets	357	Balanovsky et al., 2011	X				X
Europe
	Russia	Archangelskaja	42	Roewer et al., 2008	X	X	X	X	X
		Brianskaja	43	Roewer et al., 2008	X	X	X	X	X
		Ivanovskaja	40	Roewer et al., 2008	X	X	X	X	X
		Lipezkaja	47	Roewer et al., 2008	X	X	X	X	X
		Novgorodskaja	40	Roewer et al., 2008	X	X	X	X	X
		Orlovskaja	42	Roewer et al., 2008	X	X	X	X	X	X
		Penzenskaja	81	Roewer et al., 2008	X	X	X	X	X
		Ryasanskaja	36	Roewer et al., 2008	X	X	X	X	X	X
		Smolenskaja	43	Roewer et al., 2008	X	X	X	X	X
		Tambovskaja	48	Roewer et al., 2008	X	X	X	X	X
		Tverskaja	43	Roewer et al., 2008	X	X	X	X	X
		Vologodskaja	40	Roewer et al., 2008	X	X	X	X	X	X
	Belarus	Belarusian	327	Rębała et al., 2009		X	X	X	X
	Hungary	Hungarian	215	Völgyi et al., 2009	X
	Balkan	Greek	224	Kovatsi et al., 2009; Bosch et al., 2006	X	X	X	X	X
		Macedonian	160	Bosch et al., 2006	X	X	X	X	X
		Albanian	88	Bosch et al., 2006	X	X	X	X	X
		Romanian	109	Bosch et al., 2006	X	X	X	X	X
Middle East
	Lebanon	Lebanese	1216	Haber et al., 2011; El-Sibai et al., 2009; Zalloua et al., 2008	X	X	X	X	X	X
	Syria	Syrian	520	Haber et al., 2011; El-Sibai et al., 2009; Zalloua et al., 2008	X	X	X	X	X
	Iran	Iranian	324	Haber et al., 2011	X	X	X	X	X	X
	Turkey	Turk	663	Alakoc et al., 2010; Cinnioglu et al., 2004	X	X	X	X	X
Africa
	Botswana	Mixed Khoe-Bantu Speakers	40	Batini et al., 2011					X
	Cameroon	Baka, Bakola	69	Batini et al., 2011					X
	Central African Republic	Biaka, Mbenzele	12	Batini et al., 2011					X
	Congo	Mbuti	23	Batini et al., 2011					X
	Kenya	Samburu, Masaai	6	Batini et al., 2011					X
	Mozambique	Chopi, Makhwa, Makonde, Lomwe, Sena	12	Batini et al., 2011					X
	Nigeria	Idoma, Tiv, Yoruba, Igala	11	Batini et al., 2011					X
	South Africa	Xhosa, Bantu	11	Batini et al., 2011					X
	Uganda	Karamoja	38	Gomes et al., 2010					X
