# Supplementary material for: Afghanistan's Ethnic Groups Share a Y-Chromosomal Heritage Structured by Historical Events
Source: PLoS One. 2012 Mar 28;7(3):e34288. doi: 10.1371/journal.pone.0034288 (PMC3314501; doi:10.1371/journal.pone.0034288)
Supplement: Table S6 — BATWING topologies and dates with 95% confidence intervals of population splits derived from multiple combinations of population subsets. (XLS) [file pone.0034288.s007.xls]

## Sheet: BATWING population splits
Table S6: BATWING topologies and dates with 95% confidence intervals of population splits derived from multiple combinations of population subsets.
Population Bifurcations	Split date (ybp)	95% CI (ybp)
India, Iran, Afghanistan
87,229 samples support
(Hazara, Uzbek)	1850	575 - 3,725
((Hazara, Uzbek), Tajik)	3450	1,700 - 5,950
(((Hazara, Uzbek), Tajik), Pashtun)	4650	2,900 - 7,600
(Iran, (((Hazara, Uzbek), Tajik), Pashtun))	7525	4,950 - 11,550
(India, (Iran, (((Hazara, Uzbek), Tajik), Pashtun)))	8825	5,825 - 13,350
81,578 samples support
(Hazara, Uzbek)	2150	1,100 - 3,825
(Pashtun, Tajik)	3850	2,325 - 6,525
((Hazara, Uzbek),(Pashtun, Tajik))	4750	2,925 - 7,475
(Iran, ((Hazara, Uzbek),(Pashtun, Tajik)))	7300	4,950 - 11,125
(India, (Iran, ((Hazara, Uzbek),(Pashtun, Tajik))))	8625	5,800 - 13,125
48,461 samples support
(Ardabil, Qazvin)	2025	230 - 5,000
((Ardabil, Qazvin), Markazi)	3975	1,600 - 7,150
(((Ardabil, Qavzin), Markazi), Sistan & Balochistan)	5750	4,025 - 9,125
(Afghanistan, India)	7050	4,825 - 10,725
((((Ardabil, Qazvin), Markazi), Sistan & Balochistan),(Afghanistan, India))	9025	6,550 - 13,200
(((((Ardabil, Qazvin), Markazi), Sistan & Balochistan),(Afghanistan, India)), Mazandaran)	11350	7,825 - 16,600
40,481 samples support
(Markazi, Qazvin)	2025	225 - 5,075
(Ardabil, (Markazi, Qazvin))	4000	1,425 - 7,525
((Ardabil, (Markazi, Qazvin)), Sistan & Balochistan)	5875	3,975 - 9,750
(India, Afghanistan)	7200	5,000 - 10,925
(((Ardabil, (Markazi, Qazvin)), Sistan & Balochistan),(India, Afghanistan))	9300	6,625 - 14,000
((((Ardabil, (Markazi, Qazvin)), Sistan & Balochistan),(India, Afghanistan))), Mazandaran)	11675	7,775 - 19,875
107,617 samples support
(South India, West India)	6425	4,050 - 10,200
(North India, Afghanistan)*	7525	4,950 - 11,900
((North India, Afghanistan),(South India, West India)	9275	6,500 - 14,100
(Iran, ((North India, Afghanistan),(South India, West India))	10275	7,125 - 15,400
*Note: When Indian & Afghan populations were not pooled, the Afghan and Indian populations split cleanly.
Afghanistan, Iran, Caucasus, Lebanon, West Russia
(Iran-Ardabil, Iran-Qazvin)	1250	125 - 3,025
(Afghan-Hazara, Afghan-Uzbek)	2150	1,125 - 4,000
((Afghan-Hazara, Afghan-Uzbek), Afghan-Tajik)	3425	1,950 - 5,950
(((Afghan-Hazara, Afghan-Uzbek), Afghan-Tajik), Afghan-Pashtun)	4650	2,775 - 7,725
((Iran-Ardabil, Iran-Qazvin),Iran-Sistan&Balochistan)	5950	3,750 - 9,625
(((Iran-Ardabil, Iran-Qazvin),Iran-Sistan&Balochistan), Caucasus&Lebanon&Russia)	8350	5,675 - 12,775
((((Iran-Ardabil, Iran-Qazvin),Iran-Sistan&Balochistan), Caucasus&Lebanon&Russia), Afghanistan)	10500	7,100 - 15,825
(Russia-Orloskaja, Russia-Ryaznskaja)	850	50 - 2,525
((Russia-Orloskaja, Russia-Ryaznskaja), Russia-Volgodkaja)	2500	1,150 - 4,575
(Caucasus-Avars, Caucasus-Lezgi)	4900	2,925 - 7,975
(((Russia-Orloskaja, Russia-Ryaznskaja), Russia-Volgodkaja),Caucasus-Circasian)	6675	4,525 - 10,050
((Caucasus-Avars, Caucasus-Lezgi), Lebanon)	8425	5,825 - 12,250
((((Russia-Orloskaja, Russia-Ryaznskaja), Russia-Volgodkaja),Caucasus-Circasian), ((Caucasus-Avars, Caucasus-Lezgi), Lebanon))	9300	6,475 - 13,400
(((((Russia-Orloskaja, Russia-Ryaznskaja), Russia-Volgodkaja),Caucasus-Circasian), ((Caucasus-Avars, Caucasus-Lezgi), Lebanon)), Afghanistan)	9650	6,725 - 13,825
Caucasus
(Abkhazian, Circassian)	3975	2,375 - 6,400
(Chechen, Darginian)	4875	3,400 - 7,175
(Avars, (Chechen, Darginian))	5575	3,825 - 8,125
((Avars, (Chechen, Darginian)), Lezgi)	6375	4,275 - 9,475
((Abkhazian, Circassian), ((Avars, (Chechen, Darginian)), Lezgi))	8975	6,150 - 13,150
Balkans, Lebanon, Syria, Turkey
(Lebanon, Syria)	3700	2,550 - 5,525
((Lebanon, Syria), Turkey)	4100	2,800 - 5,525
(Balkans, ((Lebanon, Syria), Turkey))	5300	3,625 - 7,925
Iran, Afghanistan
(Iran-Markazi, Iran-Mazandaran)	725	50 - 2,450
((Iran-Markazi, Iran-Mazandaran), Iran-Qazvin)	1550	400 - 3,250
(Afghan-Hazara, Afghan-Uzbek)	2275	1,000 - 4,200
(Iran-Ardabil, ((Iran-Markazi, Iran-Mazandaran), Iran-Qazvin))	3050	1,525 - 5,325
(Afghan-Tajik, Afghan-Pashtun)	3950	2,050 - 6,650
((Afghan-Hazara, Afghan-Uzbek), (Afghan-Tajik, Afghan-Pashtun))	4850	2,825 - 8,025
(((Afghan-Hazara, Afghan-Uzbek), (Afghan-Tajik, Afghan-Pashtun)), Iran-Sistan&Balochistan)	6150	3,550 - 9,675
((((Afghan-Hazara, Afghan-Uzbek), (Afghan-Tajik, Afghan-Pashtun)), Iran-Sistan&Balochistan), (Iran-Ardabil, ((Iran-Markazi, Iran-Mazandaran), Iran-Qazvin)))	7225	4,400 - 11,550
